# Supplementary material
Source: publisher site journal article supplement (https://www.dovepress.com/article/555848)
Supplement: Supplementary file 1 [file Supplemental%20Materials_1.docx]

**Supplementary Table 1 Comparison of VTE Risk Assessments by Automated vs. Manual Review**

|  | **Pre-program group (n=322)** | **Post-program group (n=329)** | **p** |
| --- | --- | --- | --- |
| High-VTE risk, n (%) | 245(76.1%) | 190(57.8%) | <0.001 |
| Moderate-VTE risk, n (%) | 77(23.9%) | 139(42.2%) | <0.001 |

**Abbreviations:** VTE: venous thromboembolism.

**Supplemental Table 2 Summary of Clinical Pharmacist Workload in PL-VTEMP (Total Patients Served, N=329)**

| Pharmaceutical Care Activity | Patients Reached (n) | Service Coverage (%) | Data Source |
| --- | --- | --- | --- |
| Pharmacist-led Ward Rounds | 227 | 69.00% | PIP PASS Pharm Care |
| Medication Review | 329 | 100.00% | PIP PASS Pharm Care |
| VTE Monitoring Plan | 168 | 51.06% | PIP PASS Pharm Care |
| Therapy Recommendations | 75 | 22.80% | PIP PASS Pharm Care |
| Medication Counselling to physicians | 38 | 11.55% | PIP PASS Pharm Care |
| Medication education to patients | 35 | 10.64% | PIP PASS Pharm Care |
| Pharmaceutical Active Consultation | 97 | 29.48% | HIS (Consultation System) |
| Pharmaceutical Consultations | 74 | 22.49% | HIS (Consultation System) |

**Abbreviations:** VTE, venous thromboembolism; HIS, Hospital Information System.

**Table Footnotes:**

a. Pharmacist-led Ward Rounds: Number of patients with structured clinical notes from pharmacist-led ward rounds.

b. Medication Review: Comprehensive review of all inpatient medication orders for safety and appropriateness.

c. VTE Monitoring Plan: Active monitoring for thrombotic symptoms and adverse effects of anticoagulants.

d. Therapy Recommendations: Formal, documented recommendations to physicians for therapy modification.

e. Medication Counselling (to physicians): Responses to drug information inquiries initiated by physicians or nurses.

f. Medication Education (to patients): Direct patient education, primarily on the use of discharge medications like oral anticoagulants.

g. Pharmaceutical Active Consultation: Proactive, unsolicited recommendations provided by pharmacists during patient care.

h. Pharmaceutical Consultations: Formal consultations conducted in response to a physician's request.


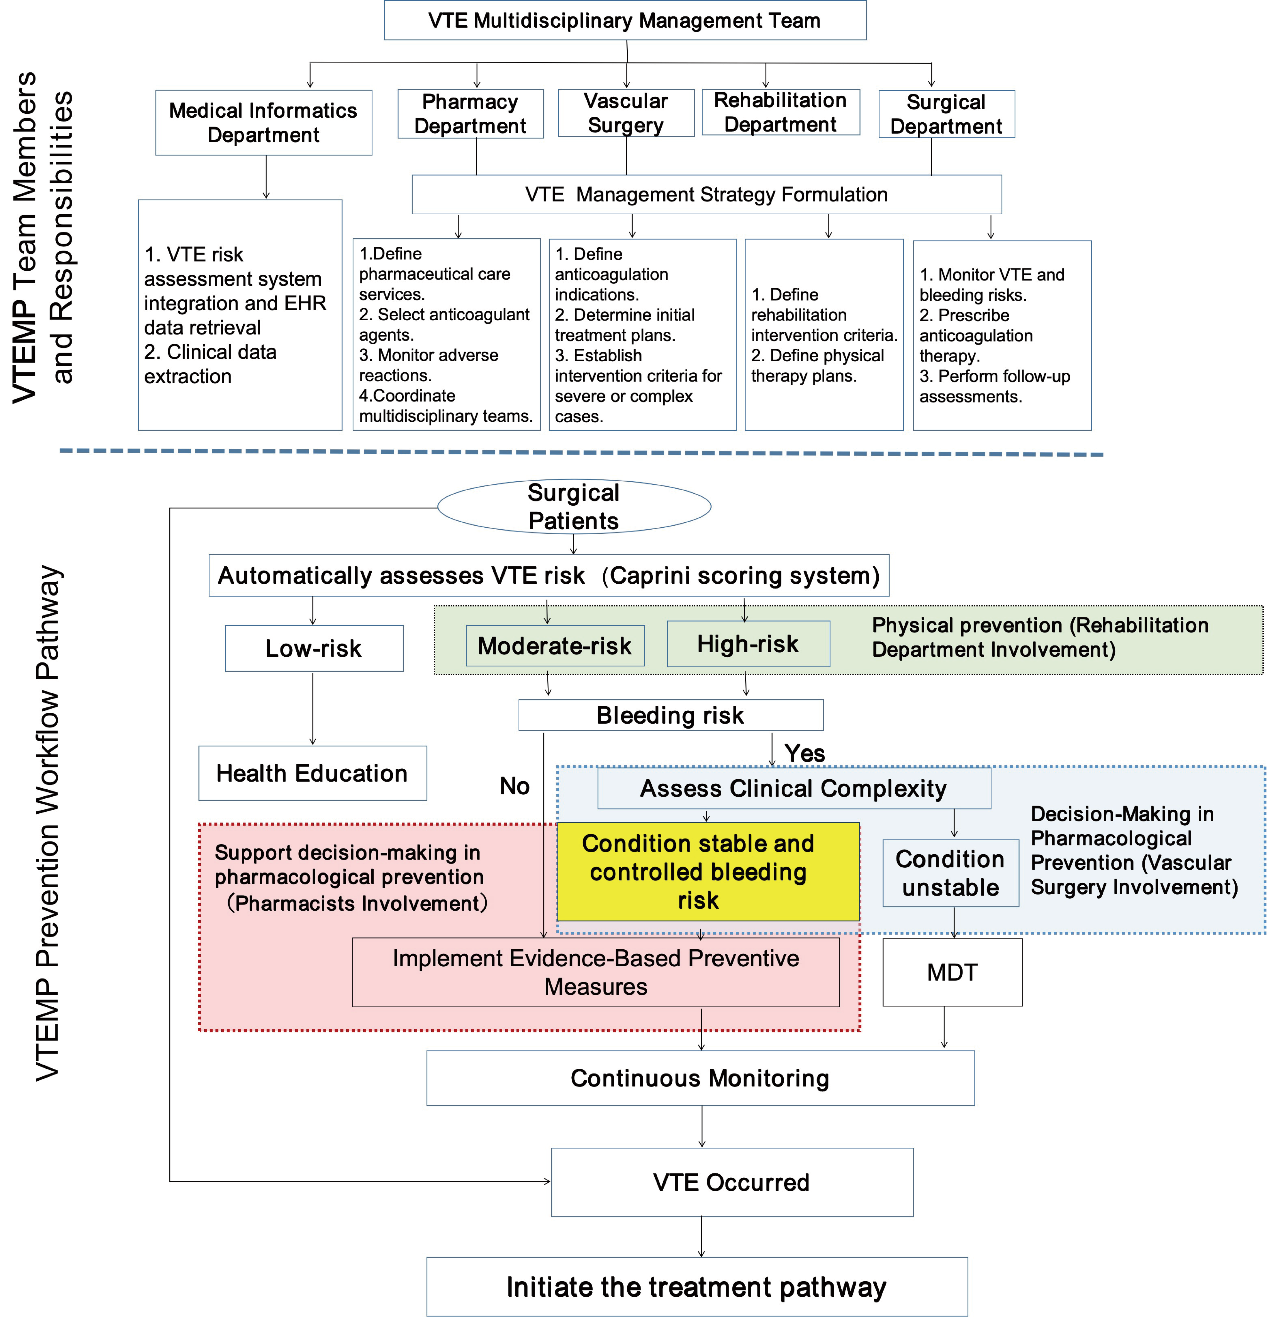


**Supplementary Figure 1** Members, Responsibilities, and Workflow Diagram of the VTEMP. The flowchart depicts the patient management protocol following an automated VTE risk assessment. Color-coding defines departmental responsibilities: green pathway indicates Rehabilitation Department involvement for physical prophylaxis guidance; blue pathway represents Vascular Surgery intervention for pharmacological prevention decisions in moderate/high-risk patients with bleeding risks; red pathway signifies Pharmacy Department support for pharmacological prevention decisions; yellow zones designate shared monitoring areas where interventions may occur independently.

**Abbreviations:** VTE, venous thromboembolism; VTEMP, VTE management program; MDT, Multidisciplinary Team.
